# Supplementary material for: TOPO mediated rapid hydrothermal synthesis and study of electrochemical performance of nano-structured copper oxide thin films
Source: Royal Society of Chemistry journal article supplement (doi:10.1039/c6se00016a), 2017-01-01
Supplement: c6se00016a1.pdf [file c6se00016a1.pdf]

### Supplimentary Information

## TOPO mediated rapid hydrothermal synthesis and study of electrochemical performance of nano-structured copper oxide thin films

A. M. Teli<sup>a</sup>, G. J. Navathe<sup>a</sup>, D. S. Patil<sup>b</sup>, P. R. Jadhav<sup>a</sup>, S. B. Patil<sup>d</sup>, T. D. Dongale, M. M. Karanjkar<sup>c</sup> Jae CheolShin<sup>b</sup>, P. S. Patil<sup>a,\*</sup>

### [1] Scanning Electron Microscopy(SEM):

Fig. S1 for SEM image of CuO-3 electrode prepared by hydrothermal methode with 0.3M CuSO<sub>4</sub> concentration at 90°C for 5min. It observed compactly arranged nanoflakes at X15,000 magnification. On the other side TOPO assisted CuOT3 sample has nanopetals on yarn-ball likestructure. The nano petals are grown after insertion of capping agent (TOPO).

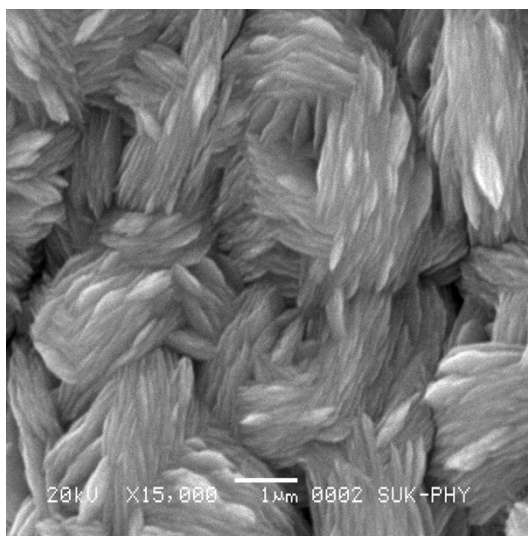

Fig. S1 Scannig electron microscopy of bare CuO-3 at X15,000

2] Electrochemical measurements:

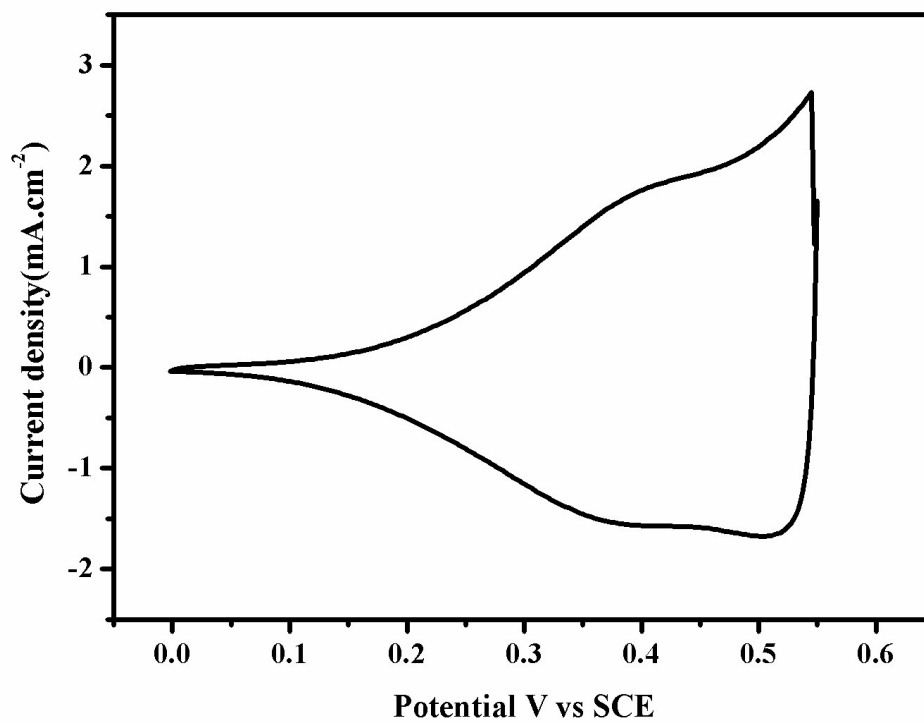

Fig. S2(a): Cyclic voltammogram (CV) of bare CuO-3 at 10mVs<sup>-1</sup> in 1M aq. KOH

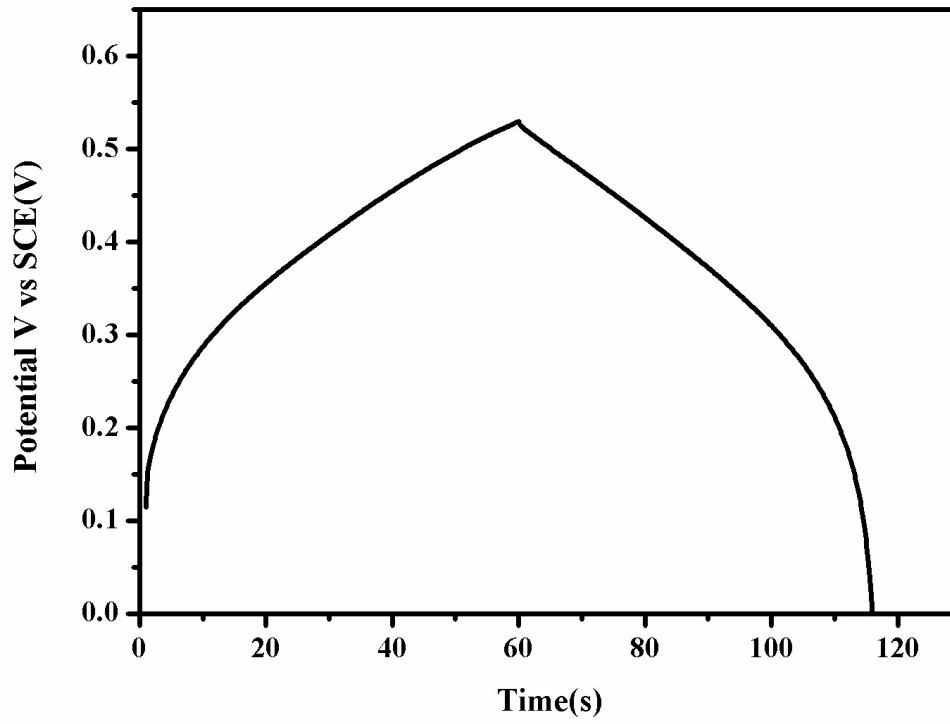

Fig. S2(b): Galvanostatic charge discharge curves of CuO-3 at  $1\text{mAcm}^{-2}$  current density in 1M aq. KOH

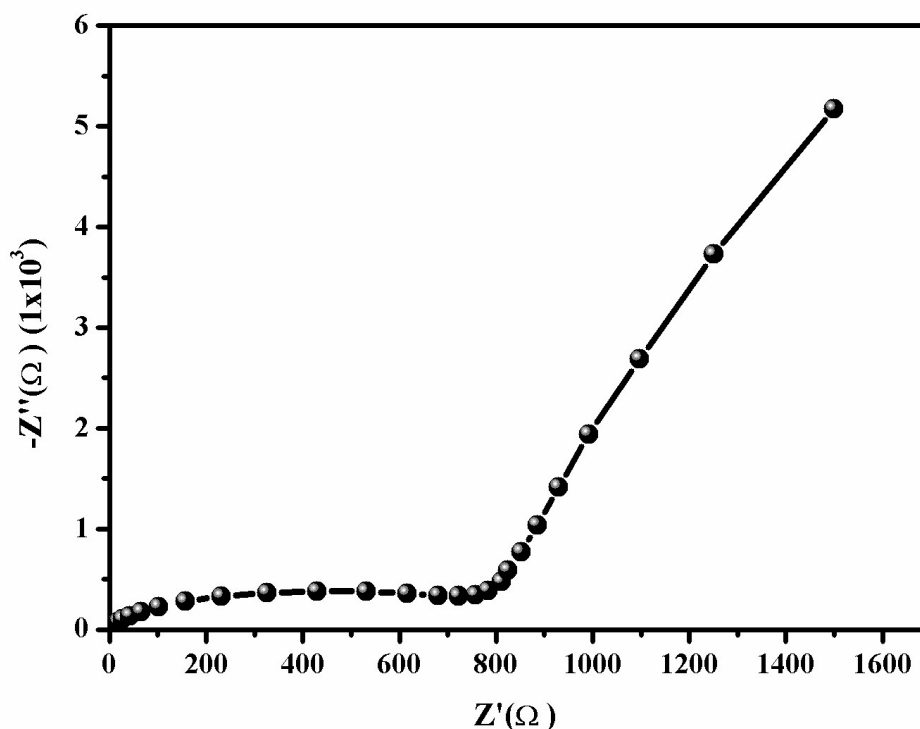

Fig.S2(c) Nyquist plot for sample CuO-3 in 1M aq. KOH electrolyte

Fig. S2(a) observed cyclic voltammogram nature of bare CuO-3 sample. A specific capacitance about  $51 \text{ Fg}^{-1}$  was achieved in 1M aq. KOH for  $10 \text{ mVs}^{-1}$  which far less than CuOT-3 sample. The compactly arranged nanoflakes reduceses the active surface reponsible for charge storage. Capping agent TOPO alters the surface morphology of the material and observed high specific capacitance.

Charge-discharge curve of bare CuO-3 mention in Fig. S2(b) at  $1 \text{ mA.cm}^{-2}$  within 0 to  $+0.53 \text{ V}$  vs SCE in 1M aq. KOH electrolyte. This charge-discharge curve is nearly triangular nature with I-R drop about  $3.7 \Omega$ . TOPO assisted CuO electrode didn't recognised any I-R drop, because of their surface modification due to insertion of TOPO.

Fig. S2(c) shows Nyquist plot of bare CuO-3 sample at open circuit potential in 1M aq.KOH. Frequency varies from 100KHz to 0.01Hz and observed series resistance ( $R_s$ )=

0.58 $\Omega$  and charge transfer resistance) =717.7 $\Omega$ , which very higher than CuOT-3 sample. TOPO assisted CuO electrodes have low series ( $R_s$ ) and charge transfer resistance ( $R_{ct}$ ) compared to bare CuO-3 sample.

Bare CuO-3 sample has compactly arranged nanopetals which reduces active surface area, due to its compact nature there is high charge transfer resistance ( $R_{ct}$ ) and I-R drop. These all resistances reduce the performances of bare CuO electrode.
